# Supplementary material for: Cost Effectiveness of Implementing Integrated Management of Neonatal and Childhood Illnesses Program in District Faridabad, India
Source: PLoS One. 2016 Jan 4;11(1):e0145043. doi: 10.1371/journal.pone.0145043 (PMC4699694; doi:10.1371/journal.pone.0145043)
Supplement: S1 Dataset — (XLSX) [file pone.0145043.s001.xlsx]

## Sheet: District Hospital
Building and Space	Room	Covered Area (sq ft)
	Doctor rooms	100
	Children ward	3000
	SCNU	500
	Laboratory	1000
	Radiology room	400
	General Administration	1000
	TOTAL	6000
		Quantity	Unit Price (INR)
Equipments/Furniture	Radiant Warmer	12	38250
	Phototherapy Unit	4	15750
	Neonatal resuscitator	9	1125
	Oxygen Hood	11	4500
	Vital sign monitor	2	157500
	Syringe pump	3	31950
	Pulse Oxymeter	5	31950
	Oxygen concentrator	5	42750
	Light examination mobile	2	36000
	Almirah	3	12000
	Beds	30	1500
	Weighing scale	10	200
	Needle cutter	10	250
	Chairs	20	50
	Table	7	140
	Fans	20	500
	Clock	5	200
	Lights	35	40
General Admin	Computer	2	25000
	Table	10	140
	Chair	30	50
	Fan	10	500
	Lights	20	40
	AC	2	25000
	Photocopier/ Printer	1	15000
	Almirahs	15	12000
	Personnel Category	Number	Gross salary (Monthly-INR)
Human Resources	1	1	35000
	2	3	25000
	3	1	9400
	4	5	9400
	5	2	8400
	6	1	55000
	7	2	35000
	8	12	25000
	9	4	4600
	10	1	4600
	11	1	6000
	12	1	20000
General Admin	13	1	70000
	14	2	65000
	15	6	24000
	16	2	18000
	17	2	8000
	18	2	6000
		Quantity (Monthly)	Unit Price (INR)
Diagnostic Tests	Hb	1196	5
	TLC	606	10
	DLC	606	10
	BT	439	10
	CT	439	10
	Platelet Count	319	10
	Bloog Group	265	40
	Malaria	143	0
	Blood Sugar	971	20
	Urea	396	20
	Creatinine	149	30
	Uric Acid	66	30
	S Bilirubin	422	30
	SGOT	269	30
	S protein	37	30
	Alk Phosphatase	24	30
	Lipid Profile	125	30
	Widal	72	30
	VDRL	92	30
	CRP	50	30
	RA Factor	39	40
	Urine Albumin	916	30
	Urine Micro	211	30
	Ketone Bodies		30
	Semen examination	3	30
	UPT	359	0
	X-Ray	170.075	40
	Ultrasound	112.124	200
		Quantity Monthly (Child health)	Unit Price (INR)
Medicine/ Consumable	Inj Ceftriaxone	300	7.5
	Inj Amikacin	200	2.88
	Inj Sodabicarb	30	2.79
	Inj Rantact	30	0.23
	Inj Phenobarbitone	30	0.129
	Inj Calcium Gluconate	200	7.4
	Inj Dopamine	30	6.2
	Inj Vit K	30	16.24
	Inj Adrenaline	30	2.64
	Inj Phenytoin	50	2.69
	Inj Hydrocortisone	50	8.27
	Inj Aminophylline	30	1.49
	Inj Ampicillin	10	5.24
	Inj Gentamicin	10	2.39
	Inj Ceftazidimine	10	21.8
	Inj Cloxacillin	20	0.137
	IV 10% Dextrose	150	8.98
	IV Isolyte	150	8.78
	IV NS	50	8.78
	IV Ringer lactate	20	9.24
	Pediaset	200	16.35
	Betadine (1 LitreBottle)	1	15
	Spirit (1 litre)	1	15
	Cotton (Roll)	10	70
	Gloves No 6.5	50	8.1
	IV Canula No 24	250	8.4
	IFT no 8	150	22
	IFT no 6	150	22
	Surgical micropore	60	20
	Gentamicin	20	0.3
	Thermometer	2	15
	Bandage	6	45
	Formalein	2	15
	Lizol	2	15
	Syp PCM	5	5
	Suction catheter	120	23
	Soframycin ointment	3	7
	Gauze piece	1	70
		Quantity	Monthly Cost (INR)
Overhead	Electricity		100000
	Water		10000
	Referral transport		75000

## Sheet: District office
	Personnel Category	Number	Gross salary (Monthly-INR)
Human Resources	1	1	60000
	2	1	20000
	3	1	8000
	4	1	8000
	5	2	8000
	6	1	8000
	7	3	9000
	8	1	9000
	9	1	15000
	10	1	7000
	11	3	7000
	12	1	7000
	13	1	70000
		Quantity	Unit Price (INR)
Equipment/ Non-consumable	Refrigerator	1	15000
	Air Conditioner	2	25000
	Table	20	140
	Chair	80	50
	Computers	3	25000
	Almirah	15	12000
	Printer/ Photocopier	2	15000
	Ice Lined Refrigerator	10	20000
	Deep Freezer	6	15000
	Room	Covered Area (sq ft)
Building and Space	DIO Room	250
	Civil Surgeon Room (CS)	300
	Guest Room	300
	Training Hall	600
	Computer Room	80
	Establishment branch	300
	Store	80
	Waiting area	300
	TOTAL	2210
		KM Travelled per month
Supervisory Travel (km)	DIO	1200
	CS	1800
		Male	Female	Total
Total number of immunizations in a year (BK Hospital)	BCG	748	686	1434
	OPV-Zero dose	925	782	1707
	DPT1	365	335	700
	DPT2	371	352	723
	DPT3	364	337	701
	OPV1	365	335	700
	OPV2	371	352	723
	OPV3	364	337	701
	DPT-B	235	234	469
	OPV-B	235	234	469
	Measles	409	408	817
	Vit A	409	408	817
	Hep B 1	231	226	457
	Hep B 2	211	212	423
	Hep B 3	195	219	414
	Total under-5 year immunizations			11255
	TT-1		1540	1540
	TT-2		945	945
	TT-3		170	170
	Total maternal immunization			2655
	Proportion child immunization (out of total)			0.80913

## Sheet: First Referral Unit (FRU)
	Personnel Code	Number	Gross salary (Monthly-INR)
Human Resources	1	1	55000
	2	2	45000
	3	1	72000
	4	3	8500
	5	6	14000
	6	15	26000
	7	3	18000
	8	1	24000
	9	3	7000
	10	3	4600
	11	1	8400
	Room No	Covered Area (sq ft)
Building and Space	Immunization Room	300
	Cold Storage	300
	LHV Room	300
	Paediatrician Room	300
	Operation Theatre	1200
	OT recovery rooms	150
	OT additional rooms	250
	Nursery Unit	625
	Ward	500
	Waiting area	1500
		Quantity	Unit Price (INR)
Equipments/Furniture	Radiant Warmer	4	38250
	Phototherapy Unit	1	15750
	Neonatal resuscitator	3	1125
	Oxygen Hood	3	4500
	Syringe pump	1	31950
	Pulse Oxymeter	1	31950
	Oxygen concentrator	2	42750
	Light examination mobile	1	36000
	Almirah	1	12000
	Weighing scale	5	200
	Needle cutter	5	250
	Chairs	20	50
	Table	7	140
	Fans	20	500
	Clock	5	200
	Lights	35	40
General Admin	Table	10	140
	Chair	30	50
	Fan	10	500
	Lights	20	40
	AC	1	25000
	Almirahs	10	12000
	Deep freezer	1	15000
	ILR	2	20000
	OT Table	1	20000
	Boyle's apparatus	1	20000
		Quantity Monthly (Child Health)	Unit Price (INR)
Medicine/ Consumable	Cap Ampicillin 500 mg	377.945	0.712
	Cap Amoxy 250 mg	251.963	1.25
	Syp Ampicillin	15.1178	5.5
	Adhesive plaster	1.25982	2
	T. Dicylco+ PCM	377.945	0.229
	T. Cefixime 100mg	62.9908	4.2
	T. antacid	151.178	0.232
	Nystatin vaginal pessary	125.982	2.704
	T. Diclofenac	1259.82	0.0848
	T. B-complex	1259.82	0.0848
	T. Norfloxacin 400 mg	251.963	0.4
	T. Glimpride 2 mg	62.9908	0.07
	T. Ofloxacin 200mg	125.982	0.4
	ORS powder	251.963	0.04
	T. Ibugesic+PCM	125.982	0.42
	T calcium	377.945	0.17
	T metformin 500 mg	125.982	0.169
	T Ranitidine	629.908	0.232
	Cotton 500 gm	5.03926	44
	Decox cough syp	12.5982	5.4
	Syp Antacid	10.0785	6.82
	Analgesic gel	5.03926	5.6
	Vitamin A solution	12.5982	0.07
	Fluconazole oint	12.5982	26.32
	Surgical gloves	25.1963	8.1
	Crape bandage 4"	3.02356	25
	Inj Methyl ergometrine	25.1963	1.2
	Inj Oxytocin	25.1963	1.44
	Disposable syringes 1 ml	125.982	1.09
	Disposable syringes 5 ml	75.589	1.24
	Disposable syringes 2 ml	62.9908	1.14
	Disposable needle	226.767	0.5
	Cord clamp	12.5982	2.3
	Trugut chromic 1-0	0.377945	1.8
	Hand duster	6.04712	2.3
	Floor duster	1.51178	3.4
	Inj Diazepam	6.29908	1.64
	Inj Ondesetron	12.5982	2
	Surgical spirit	0.629908	15
	Inj tranexemic acid	3.77945	2.3
	Inj Misoprostol	2.51963	1.9
	Indoor files	125.982	0.5
	Inj dexamethasone	12.5982	2.74
	IV canula No 20	25.1963	7.8
	Macintosh	1.25982	3
	thermometer	0.251963	15
	sterilizer pressure type	0.125982	165
	Inj PCM	6.29908	1.7
	Inj Sodabicarb	6.29908	2.79
	Sponge holder	0.251963	3
	Inj Chlororquine	5.03926	0.305
	Tab albendazole	50.3926	0.48
	Inj Tramadol	62.9908	2.64
	Tab azithromycin	125.982	2.46
	PC enema	0.377945	1.2
	RNTCP Cat 1	1.00785	158.4
	RNTCP Cat 2	0.125982	283.36
	Inj Streptomycin	3.02356	5.6
		Quantity (Monthly)	Unit Price (INR)
Diagnostic Tests	Hb	273.75	5
	BT	73	10
	CT	73	10
	Urine	237.25	10
	Bld sugar	9.125	20
	RH Foetus	9.125	10
	Widal	100.375	30
	Platelet	100.375	10
	Blg gp	237.25	40
	TLC/ DLC	63.875	20
	ESR	63.875	30
		Quantity	Annual Cost (INR)
Overhead	Electricity	98165.9	12367.1
	Water	36812.2	4637.66
	Referral transport	110437	13913
		Beneficiaries
Services	BCG	490
Under 5 Population	DPT1	300
	DPT2	340
	DPT3	210
	OPV-zero	300
	Measles	97
	DPT-B	210
	Vitamin A dose 2	390
	Vitamin A dose 3	217
	IPD admissions	60
	OPD consultations	1308
Over 5 Population	TT1	397
	TT2	478
	Sterilization	28
	IUD	170
	Emergency OP	11
	OCP	1520
	IPD admissions	217
	OPD consultations	2665

## Sheet: Intervention Costs
			Gross salary (INR)
	Personnel Code	Number	2007	2008	2009	2010
Human Resources	1	1	570000	600000	792000	798600
	2	1	388000	530765	852000	625600
	3	1	234167	301797	472333	436435
	4	1	99000	235125	306262	164821
	5	1	0	192780	305107	143527
	6	1	253182	339672	318678	132411
	7	1	156744	134046	144353	74635
	8	1	36800	135305	142875	74635
	9	19	60227	65119	78187	22854
			Amount (INR)
			2007	2008	2009	2010
Medicine/ Consumable	ORS		803712	429832	199420	210530
	Zinc		216216	433076	264600	194569
	PCM		66443	17308	151675	153994
	Septran			22876	30014	55277
	G.V Paints			4052
	Printing & Stationery		19277	80493	9048
	Spiral Bound Recording Form		257350	312233
	Weighing Scale		275595	97188	11250	69470
	Dai Kit			101400	27300
	Slip Book. (Refferal Slip)			24811	17498
			Total Expenditure (INR)
			2007	2008	2009	2010
Social Mobilization Costs	Women's meeting		0	313286	439581	129539
			Total Expenditure (INR)
			2007	2008	2009	2010
IEC/ BCC Material Costs	Wall Paints		81900	476850	0	4250
	Name Plates		0	19142	2635	0
	Banner		24050	0	0	0
			Total Expenditure (INR)
			2007	2008	2009	2010
Supervision	Senior Consultant		193767	296184	412920	112096
	Field Manager		50160	50160	52800	30800
	Supervisor		326040	326040	476520	476520
Field Office
Building and Space	Room No.	Covered Area (sq ft)
	1	200
	2	400
	3	650
	4	200
	5	150
		Quantity	Unit Price (INR)
Equipment/ Non-consumable	Table	25	140
	Chair	50	50
	Computer	2	25000
	Fans	10	500
	Clock	2	200
	Lights	15	40
	AC	2	25000
	Photocopier/ Printer	1	15000
	Almirahs	6	12000
	Bikes	10	35500

## Sheet: Data on Trainings
Trainings in Intervention Area	S.No.	Name of training	Period	Number of days of training	Proportion Contribution to Child Health	Participants	Number of resorce persons	Honararium_participant	Honararium_resoure person	Travel_participants	Travel_resource person	Hall charges/ overhead	Food espenses	Any other	Total	Number of ASHA	Number of AWW	Number of ANM	Number of MO/ QMP	Number of RMP	Number of TBA	Total Monthly Salary of Participants and Resource Persons
	1	Training for Health Worker	21 FEB TO 1ST MARCH, 2007	9	1	35	12	34400	99200	31650	0	0	52500	5608	223358	14	14	7				192500
	2	Training for Health Worker	19 FEB TO 27 FEB, 2007	9	1	23	4	128300	52000	0	0	0	21742	500	202542	9.2	9.2	4.6				126500
	3	Training for Health Worker	28thMay - 5th June, 2007	9	1	22	3	25600	24000	47108	0	0	4100	8094	108902	8.8	8.8	4.4				121000
	4	Training for Health Worker	19thJune - 27th June, 2007	9	1	23	3	18400	24000	33370	0	0	1681	4429	81880	9.2	9.2	4.6				126500
	5	Training for Health Worker	6thJune - 14th June, 2007	9	1	67	3	41000	24000	43821	0	0	2616	4024	115461	26.8	26.8	13.4				368500
	6	Training for Health Worker	25thMAY - 2ndJUNE , 2007	9	1	52	3	39800	24000	47834	0	0	2114	6487	120235	20.8	20.8	10.4				286000
	7	Training for Health Worker	16thJUNE - 25thJUNE , 2007	9	1	30	3	24000	24000	53069	0	0	1430	3327	105826	12	12	6				165000
	8	Training for Health Worker	4thJUNE - 12thJUNE , 2007	9	1	43	3	29550	24000	46863	0	0	3640	4032	108085	17.2	17.2	8.6				236500
	9	Training for Health Worker	3APR - 11APR , 2007	9	1	39	3	30100	24000	49814	0	0	28210	3984	136108	15.6	15.6	7.8				214500
	10	Training for Health Worker	3Apr - 11 Apr, 2007	9	1	38	3	28400	24000	0	0	0	0	0	52400	15.2	15.2	7.6				209000
	11	Training for Health Worker	12thAPR - 20thAPR , 2007	9	1	38	3	58800	24000	54367	0	0	30981	3059	171207	15.2	15.2	7.6				209000
	12	Training for Health Worker	26thAPR - 4thMAY , 2007	9	1	79	3	37367	24000	40766	0	0	4008	7458	113599	31.6	31.6	15.8				434500
	13	Training for Health Worker	7th - 16th Apr, 2007	9	1	31	3	27200	24000	23645	0	0	30696	3950	109491	12.4	12.4	6.2				170500
	14	Training for Health Worker	18th - 26th Apr, 2007	9	1	27	3	21600	24000	45330	0	0	28468	10936	130334	10.8	10.8	5.4				148500
	15	Training for Health Worker	7thMAY - 15thMAY , 2007	9	1	70	3	50700	24000	28884	0	0	224	18672	122480	28	28	14				385000
	16	Training for Health Worker	16thMAY - 24thMAY , 2007	9	1	32	3	33882	24000	29453	0	0	2743	19496	109574	12.8	12.8	6.4				176000
	17	Training for Health Worker	9thMay - 17th May, 2007	9	1	32	3	28000	24000	48720	0	0	2336	3550	106606	12.8	12.8	6.4				176000
	18	Training for Health Worker	30thApr - 8th May, 2007	9	1	45	3	52350	24000	38493	0	0	2260	6431	123534	18	18	9				247500
	19	Training for Health Worker	15 MAR TO 23RD MAR, 2007	9	1	31	3	28000	24000	25100	0	0	29400	16418	122918	12.4	12.4	6.2				170500
	20	Training for Health Worker	27th - 4th Apr, 2007	9	1	30	3	37700	24000	30100	0	0	27344	19732	138876	12	12	6				165000
	21	Training for Health Worker	24MAR - 2APR , 2007	9	1	29	3	37530	24000	26014	0	0	26220	16344	130108	11.6	11.6	5.8				159500
	22	Training for Health Worker	17th - 26th MARCH, 2007	9	1	31	3	28000	24000	29750	6594	0	27000	5140	120484	12.4	12.4	6.2				170500
	23	Training for Health Worker	4thJULY - 12thJULY , 2007	9	1	43	3	34267	24000	50300	0	0	2805	2982	114354	17.2	17.2	8.6				236500
	24	Training for Health Worker	16thJULY - 24thJULY , 2007	9	1	79	3	36535	24000	59661	0	0	1810	10849	132855	31.6	31.6	15.8				434500
	25	Training for Health Worker	10thJuly - 18th July, 2007	9	1	28	3	31400	24000	77900	0	0	1978	7798	143076	11.2	11.2	5.6				154000
	26	Training for Health Worker	29thJune - 7th July, 2007	9	1	39	3	29568	24000	47997	0	0	2103	16634	120302	15.6	15.6	7.8				214500
	27	Training for Health Worker	26th July - 3rd Aug, 2007	9	1	71	3	38069	24000	84064	0	0	3076	19022	168231	28.4	28.4	14.2				390500
	28	Training for Health Worker	12th Nov - 20th Nov, 2007	9	1	54	3	23352	24000	39748	0	0	3298	2107	92505	21.6	21.6	10.8				297000
	29	Training for Health Worker	21st Nov - 29th Nov, 2007	9	1	56	3	24585	24000	38282	0	0	2805	1893	91565	22.4	22.4	11.2				308000
	30	Training for Health Worker	11th Dec - 19th Dec, 2007	9	1	54	3	21052	24000	34500	0	0	2320	881	82753	21.6	21.6	10.8				297000
	31	Training for Health Worker	20th Dec - 29th Dec, 2007	9	1	59	3	27452	24000	35202			2622	729	90005	23.6	23.6	11.8				324500
	32	Training for Health Worker	30th Nov - 10th Dec, 2007	11	1	53	3	25052	24000	40500			2681		92233	21.2	21.2	10.6				291500
	33	Training for Health Worker	18feb,2008 to 26 feb 08	9	1	28	3	20800	24000	0	0	0	13861	24603	83264	11.2	11.2	5.6				154000
	34	Training for Health Worker	2nd april 08 to 10 apr,08	9	1	39	3	17150	24000	36123		0	9845	1877	88995	15.6	15.6	7.8				214500
	35	Training for Health Worker	11th Apr - 19th Apr, 2008	9	1	30	3	13750	24000	26000	0	0	0	11166	74916	12	12	6				165000
	36	Training for Health Worker	16th Jul - 24th Jul, 2009	9	1	17	3	13600	24000	0	0	0	0	0	37600	6.8	6.8	3.4				93500
	37	Training for Health Worker	05th May - 13th May, 2008	9	1	32	3	5933	24000	6900				9328	46161	12.8	12.8	6.4				176000
	38	Training for Health Worker	5th August - 13th August , 2008	9	1	41	3	18968	24000	44950	0	0	0	2992	90910	16.4	16.4	8.2				225500
	39	Training for Health Worker	20th August - 28th August , 2008	9	1	64	3	29402	24000	46650		0	0	3418	103470	25.6	25.6	12.8				352000
	40	Training for Health Worker	16th Jul - 24th Jul, 2009	9	1	24	3	14100	24000	9250		0	6010	9610	62970	9.6	9.6	4.8				132000
	41	Training for Health Worker	22nd Jul - 30th Jul, 2009	9	1	19	3	14100	24000	15300		0	6360	6606	66366	7.6	7.6	3.8				104500
	42	Training for Health Worker	November,2009 to 8th December, 2009.	9	1	19	3	14100	24000	26450	0	0	10780	2658	77988	7.6	7.6	3.8				104500
	43	QMP	7th oct,2007	1	1	18		36200		10640	0		9432	2182	58454				18			630000
	45	RMP	8th Aug to 9th Aug,2007	2	1	68	2	13600	2000	1400			810	1965	19775					68		816000
	46	RMP	2nd Aug to 3rd Aug 2007	2	1	10	2	2000	2000	1400			810	1965	8175					10		120000
	47	RMP	2nd June 2007	1	1	18	2	1800	2000	1050			2160	2037	9047					18		216000
	48	RMP	7th June 2007	1	1	15	2	1500	2000	4100			2895	1177	11672					15		180000
	49	RMP	9thJULY TO 10thJULY, 2007	2	1	25	2	5000	2000	3200			3840	1860	15900					25		300000
	50	RMP	18th July to 19th July,2007	2	1	22	2	4400	2000	3600			3840	2110	15950					22		264000
	51	RMP	18th July to 19th July,2007	2	1	22	2	4400	2000	3600			3840	2110	15950					22		264000
	52	RMP	24th July to 25th July 2007	2	1	27	2	5400	2000	750			1720	1410	11280					27		324000
	53	RMP	30th July to 31st July 2007	2	1	19	2	3800		900			1480	2100	8280					19		228000
	54	TBA	5th June 2007	1	1	18		900		900			345	327	2472						18	27000
	55	TBA	8th Aug to 9th Aug,2007	2	1	29		1450		700			455	1635	4240						29	43500
	56	TBA	9th Aug 2007	1	1	27		1350		1400			603	705	4058						27	40500
	57	TBA	23rd July 2007	1	1	20		1000		1300			680	555	3535						20	30000
	58	TBA	17th July 2007	1	1	28		1400		1200			700	620	3920						28	42000
	59	TBA	18th MAY, 2007	1	1	17		850		700			435	496	2481						17	25500
Joint Trainings (Intervention and Control both)	S.No.	Training	Amount (a)	Relevance to Child Health	Number of days of training		Total participants ( c )	Particpants_int	Participants_control	Participants_common	Number of ASHA	Number of AWW	Number of ANM	Number of MO	Number of Specialist	Others	Total Monthly Salary of Participants and Resource Persons
	1	SBA	44258	2	21		4	2	2	0			4	2	2		260000
	2	SBA	39979	2	21		4	1	2	1			4	2	3		315000
	3	SBA	42069	2	21		4	0	4	0			4	2	3		315000
	4	IUCD	21575	0	7		10	1	9	0			10	1	1		290000
	5	SBA	40030	2	21		4	1	3	0			4	1	3		280000
	6	SBA	40039	2	21		4	2	2	0			4	1	3		280000
	7	HMIS	5610	2	1		33	11	0	22			10	4	10	9	998000
	8	ASHA	17863	2	5		19	0	19	0	19			2	1		139250
	9	ASHA	23380	2	5		25	25	0	0	25			2	1		143750
	10	ASHA	25757	2	5		22	4	5	13	22			2	1		141500
	11	ASHA	15960	2	5		15	6	2	7	15			2	2		191250
	12	ASHA	40175	2	5		36	18	18	0	36			2	2		207000
	13	SBA	40024	2	21		4	0	3	1			4	1	3		280000
	14	SBA	39970	2	21		4	0	3	1			4	1	3		280000
	15	SBA	39959	2	21		4	0	3	1			4	1	3		280000
	16	SBA	35760	2	21		4	0	2	2			4	2	1		205000

## Sheet: Immunization Costs
	Immunization Costs in Intervention Area
	Vaccine	Coverage	Number of chlidren	Unit price (INR)
	BCG	0.792	4520.6	4.95
	OPV-Zero dose	0.37	4520.6	7.2
	DPT1	0.63	4520.6	15.75
	DPT2	0.61	4520.6	15.75
	DPT3	0.548	4520.6	15.75
	OPV1	0.64	4520.6	7.2
	OPV2	0.63	4520.6	7.2
	OPV3	0.548	4520.6	7.2
	DPT-B	0.42	4520.59	15.75
	OPV-B	0.45	4520.59	7.2
	Measles	0.57	4520.6	9.9
	Vit A	0.3	4520.6	0
	Hep B 1	0.1	4520.6	13.5
	Hep B 2	0.08	4520.6	13.5
	Hep B 3	0.03	4520.6	13.5
	Total
	Immunization Costs in Control Area
	Vaccine	Coverage Proportion	Number of chlidren	Unit price
	BCG	0.792	4520.6	4.95
	OPV-Zero dose	0.37	4520.6	7.2
	DPT1	0.63	4520.6	15.75
	DPT2	0.61	4520.6	15.75
	DPT3	0.548	4520.6	15.75
	OPV1	0.64	4520.6	7.2
	OPV2	0.63	4520.6	7.2
	OPV3	0.548	4520.6	7.2
	DPT-B	0.42	4520.59	15.75
	OPV-B	0.45	4520.59	7.2
	Measles	0.57	4520.6	9.9
	Vit A	0.3	4520.6	0
	Hep B 1	0.1	4520.6	13.5
	Hep B 2	0.08	4520.6	13.5
	Hep B 3	0.03	4520.6	13.5
	Total
